# Supplementary material for: A side-by-side comparison of the new VITEK MS PRIME and the MALDI Biotyper sirius in the clinical microbiology laboratory
Source: PubMed Central journal article supplement (PMC10587274; doi:10.1007/s10096-023-04666-x), 2023-10-05
Supplement: 10096_2023_4666_MOESM1_ESM.pdf [file 10096_2023_4666_MOESM1_ESM.pdf]

# A side-by-side comparison of the new VITEK® MS PRIME and the Bruker Biotyper® sirius MALDI-TOF MS systems in the clinical microbiology laboratory

Philipp Thelen, Sandra Gräber, Erika Schmidt and Axel Hamprecht

## Supplementary Material

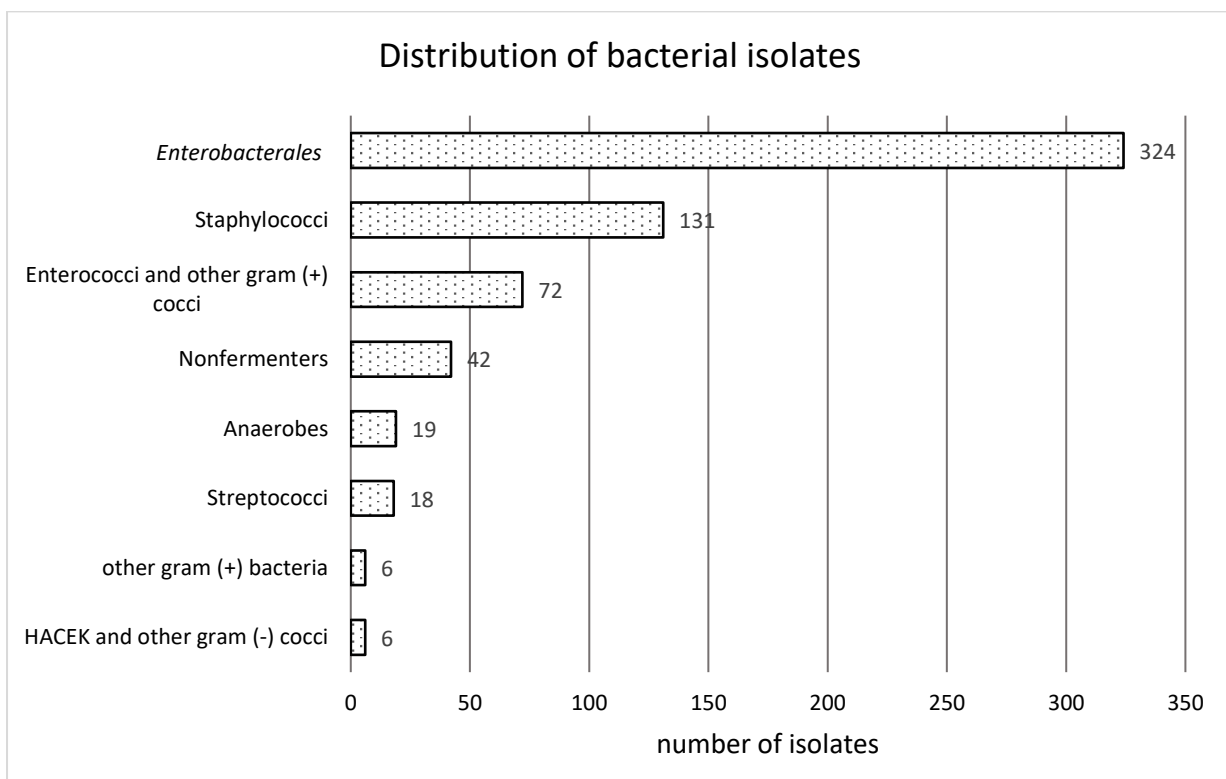

Fig. 1 species distribution of bacterial isolates

**TABLE 1** Summary of MALDI-TOF MS results for 618 isolates

| Genus and species                           | Biotyper® sirius |            |                 |                 |                       |                   | VITEK® MS PRIME         |                            |                    |                   |
|---------------------------------------------|------------------|------------|-----------------|-----------------|-----------------------|-------------------|-------------------------|----------------------------|--------------------|-------------------|
|                                             | No. of isolates  | % isolates | log(score) >= 2 | low consistency | log(score) 1.7 - 1.99 | No identification | Confidence score 99.9 % | Confidence score 60-99.8 % | low discrimination | No identification |
| <b>Enterobacteriales (20 species)</b>       |                  |            |                 |                 |                       |                   |                         |                            |                    |                   |
| <i>Escherichia coli</i>                     | 172              | 27.83%     | 165             | 0               | 4                     | 3                 | 168                     | 2                          | 1                  | 1                 |
| <i>Citrobacter amalonaticus</i>             | 2                | 0.32%      | 2               | 0               | 0                     | 0                 | 2                       | 0                          | 0                  | 0                 |
| <i>Citrobacter braakii</i>                  | 1                | 0.16%      | 0               | 1               | 0                     | 0                 | 0                       | 1                          | 0                  | 0                 |
| <i>Citrobacter freundii</i>                 | 4                | 0.65%      | 4               | 0               | 0                     | 0                 | 4                       | 0                          | 0                  | 0                 |
| <i>Citrobacter koseri</i>                   | 9                | 1.46%      | 9               | 0               | 0                     | 0                 | 9                       | 0                          | 0                  | 0                 |
| <i>Enterobacter cloacae complex</i>         | 22               | 3.56%      | 21              | 1               | 0                     | 0                 | 0                       | 0                          | 21                 | 1                 |
| <i>Klebsiella aerogenes</i>                 | 2                | 0.32%      | 2               | 0               | 0                     | 0                 | 2                       | 0                          | 0                  | 0                 |
| <i>Klebsiella oxytoca</i>                   | 9                | 1.46%      | 9               | 0               | 0                     | 0                 | 8                       | 1                          | 0                  | 0                 |
| <i>Klebsiella pneumoniae</i>                | 43               | 6.96%      | 41              | 0               | 1                     | 1                 | 38                      | 1                          | 0                  | 4                 |
| <i>Klebsiella variicola</i>                 | 1                | 0.16%      | 1               | 0               | 0                     | 0                 | 0                       | 0                          | 1                  | 0                 |
| <i>Proteus mirabilis</i>                    | 33               | 5.34%      | 33              | 0               | 0                     | 0                 | 33                      | 0                          | 0                  | 0                 |
| <i>Proteus hauseri / penneri / vulgaris</i> | 0                | 1.46%      | 8               | 1               | 0                     | 0                 | 8                       | 0                          | 1                  | 0                 |
| <i>Serratia liquefaciens</i>                | 1                | 0.16%      | 1               | 0               | 0                     | 0                 | 1                       | 0                          | 0                  | 0                 |
| <i>Serratia marcescens</i>                  | 4                | 0.65%      | 4               | 0               | 0                     | 0                 | 4                       | 0                          | 0                  | 0                 |
| <i>Serratia proteamaculans</i>              | 1                | 0.16%      | 1               | 0               | 0                     | 0                 | 1                       | 0                          | 0                  | 0                 |
| <i>Morganella morganii</i>                  | 5                | 0.81%      | 5               | 0               | 0                     | 0                 | 5                       | 0                          | 0                  | 0                 |
| <i>Lelliottia amnigena</i>                  | 1                | 0.16%      | 1               | 0               | 0                     | 0                 | 0                       | 0                          | 0                  | 1                 |
| <i>Providencia stuartii</i>                 | 3                | 0.49%      | 3               | 0               | 0                     | 0                 | 3                       | 0                          | 0                  | 0                 |
| <i>Raoultella ornithinolytica</i>           | 1                | 0.16%      | 1               | 0               | 0                     | 0                 | 1                       | 0                          | 0                  | 0                 |
| <i>Salmonella species</i>                   | 1                | 0.16%      | 1               | 0               | 0                     | 0                 | 1                       | 0                          | 0                  | 0                 |

(Continued on next page)

**TABLE 2** (Continued)

| Genus and species                                       | No. of isolates | % isolates | Biotyper® sirius |                 |                       |                   | VITEK® MS PRIME         |                            |                    |                   |
|---------------------------------------------------------|-----------------|------------|------------------|-----------------|-----------------------|-------------------|-------------------------|----------------------------|--------------------|-------------------|
|                                                         |                 |            | log(score) >= 2  | low consistency | log(score) 1.7 - 1.99 | No identification | Confidence score 99.9 % | Confidence score 60-99.8 % | low discrimination | No identification |
| <b>Nonfermenters (7 species)</b>                        |                 |            |                  |                 |                       |                   |                         |                            |                    |                   |
| <i>Pseudomonas aeruginosa</i>                           | 30              | 4.85%      | 30               | 0               | 0                     | 0                 | 29                      | 1                          | 0                  | 0                 |
| <i>Stenotrophomonas maltophilia</i>                     | 6               | 0.97%      | 6                | 0               | 0                     | 0                 | 6                       | 0                          | 0                  | 0                 |
| <i>Acinetobacter baumannii</i>                          | 1               | 0.16%      | 1                | 0               | 0                     | 0                 | 1                       | 0                          | 0                  | 0                 |
| <i>Acinetobacter baylyi</i>                             | 1               | 0.16%      | 1                | 0               | 0                     | 0                 | 0                       | 0                          | 0                  | 1                 |
| <i>Acinetobacter pittii</i>                             | 1               | 0.16%      | 1                | 0               | 0                     | 0                 | 1                       | 0                          | 0                  | 0                 |
| <i>Acinetobacter ursingii</i>                           | 1               | 0.16%      | 1                | 0               | 0                     | 0                 | 1                       | 0                          | 0                  | 0                 |
| <i>Delftia acidovorans</i>                              | 2               | 0.32%      | 0                | 2               | 0                     | 0                 | 2                       | 0                          | 0                  | 0                 |
| <b>Enterococci and other gram (+) cocci (3 species)</b> |                 |            |                  |                 |                       |                   |                         |                            |                    |                   |
| <i>Enterococcus faecalis</i>                            | 44              | 7.12%      | 43               | 0               | 1                     | 0                 | 43                      | 1                          | 0                  | 0                 |
| <i>Enterococcus faecium</i>                             | 27              | 4.37%      | 27               | 0               | 0                     | 0                 | 26                      | 0                          | 0                  | 1                 |
| <i>Aerococcus urinae</i>                                | 1               | 0.16%      | 1                | 0               | 0                     | 0                 | 1                       | 0                          | 0                  | 0                 |
| <b>Staphylococci (10 species)</b>                       |                 |            |                  |                 |                       |                   |                         |                            |                    |                   |
| <i>Staphylococcus aureus</i>                            | 72              | 11.65%     | 72               | 0               | 0                     | 0                 | 72                      | 0                          | 0                  | 0                 |
| <i>Staphylococcus capitis</i>                           | 1               | 0.16%      | 1                | 0               | 0                     | 0                 | 1                       | 0                          | 0                  | 0                 |
| <i>Staphylococcus caprae</i>                            | 2               | 0.32%      | 1                | 0               | 1                     | 0                 | 2                       | 0                          | 0                  | 0                 |
| <i>Staphylococcus epidermidis</i>                       | 39              | 6.31%      | 33               | 0               | 5                     | 1                 | 39                      | 0                          | 0                  | 0                 |
| <i>Staphylococcus haemolyticus</i>                      | 14              | 2.27%      | 9                | 0               | 3                     | 2                 | 14                      | 0                          | 0                  | 0                 |
| <i>Staphylococcus hominis</i>                           | 1               | 0.16%      | 1                | 0               | 0                     | 0                 | 1                       | 0                          | 0                  | 0                 |
| <i>Staphylococcus lugdunensis</i>                       | 1               | 0.16%      | 0                | 0               | 1                     | 0                 | 1                       | 0                          | 0                  | 0                 |
| <i>Staphylococcus saprophyticus</i>                     | 1               | 0.16%      | 1                | 0               | 0                     | 0                 | 1                       | 0                          | 0                  | 0                 |
| <i>Staphylococcus saccharolyticus</i>                   | 1               | 0.16%      | 1                | 0               | 0                     | 0                 | 1                       | 0                          | 0                  | 0                 |

(Continued on next page)

TABLE 3 (Continued)

| Genus and species                                 | Biotyper® sirius |            |                 |                 |                       |                   | VITEK® MS PRIME         |                            |                    |                   |
|---------------------------------------------------|------------------|------------|-----------------|-----------------|-----------------------|-------------------|-------------------------|----------------------------|--------------------|-------------------|
|                                                   | No. of isolates  | % isolates | log(score) >= 2 | low consistency | log(score) 1.7 - 1.99 | No identification | Confidence score 99.9 % | Confidence score 60-99.8 % | low discrimination | No identification |
| <b>Streptococci (7 species)</b>                   |                  |            |                 |                 |                       |                   |                         |                            |                    |                   |
| <i>Streptococcus agalactiae</i>                   | 8                | 1.29%      | 8               | 0               | 0                     | 0                 | 6                       | 2                          | 0                  | 0                 |
| <i>Streptococcus constellatus</i>                 | 1                | 0.16%      | 1               | 0               | 0                     | 0                 | 1                       | 0                          | 0                  | 0                 |
| <i>Streptococcus dysgalactiae</i>                 | 1                | 0.16%      | 1               | 0               | 0                     | 0                 | 0                       | 0                          | 1                  | 0                 |
| <i>Streptococcus infantarius</i>                  | 1                | 0.16%      | 0               | 1               | 0                     | 0                 | 1                       | 0                          | 0                  | 0                 |
| <i>Streptococcus mitis_oralis</i>                 | 5                | 0.81%      | 5               | 0               | 0                     | 0                 | 3                       | 1                          | 0                  | 1                 |
| <i>Streptococcus sanguinis</i>                    | 1                | 0.16%      | 1               | 0               | 0                     | 0                 | 1                       | 0                          | 0                  | 0                 |
| <i>Streptococcus vestibularis</i>                 | 1                | 0.16%      | 0               | 1               | 0                     | 0                 | 0                       | 0                          | 1                  | 0                 |
| <b>HACEK and other gram (-) cocci (6 species)</b> |                  |            |                 |                 |                       |                   |                         |                            |                    |                   |
| <i>Haemophilus influenzae</i>                     | 1                | 0.16%      | 1               | 0               | 0                     | 0                 | 1                       | 0                          | 0                  | 0                 |
| <i>Haemophilus parainfluenzae</i>                 | 1                | 0.16%      | 1               | 0               | 0                     | 0                 | 1                       | 0                          | 0                  | 0                 |
| <i>Kingella kingae</i>                            | 1                | 0.16%      | 1               | 0               | 0                     | 0                 | 1                       | 0                          | 0                  | 0                 |
| <i>Neisseria flavescens/subflava</i><br>group     | 1                | 0.16%      | 1               | 0               | 0                     | 0                 | 1                       | 0                          | 0                  | 0                 |
| <i>Paracoccus yeei</i>                            | 1                | 0.16%      | 1               | 0               | 0                     | 0                 | 1                       | 0                          | 0                  | 0                 |
| <i>Roseomonas mucosa</i>                          | 1                | 0.16%      | 1               | 0               | 0                     | 0                 | 1                       | 0                          | 0                  | 0                 |
| <b>other gram (+) bacteria (5 species)</b>        |                  |            |                 |                 |                       |                   |                         |                            |                    |                   |
| <i>Bacillus cereus</i>                            | 1                | 0.16%      | 1               | 0               | 0                     | 0                 | 0                       | 1                          | 0                  | 0                 |
| <i>Corynebacterium striatum</i>                   | 2                | 0.32%      | 2               | 0               | 0                     | 0                 | 2                       | 0                          | 0                  | 0                 |
| <i>Gardnerella leopoldii / swidsinski</i>         | 1                | 0.16%      | 1               | 0               | 0                     | 0                 | 0                       | 0                          | 0                  | 1                 |
| <i>Gardnerella vaginalis</i>                      | 1                | 0.16%      | 1               | 0               | 0                     | 0                 | 1                       | 0                          | 0                  | 0                 |
| <i>Rothia mucilaginosa</i>                        | 1                | 0.16%      | 1               | 0               | 0                     | 0                 | 1                       | 0                          | 0                  | 0                 |

(Continued on next page)

**TABLE 4** (Continued)

| Genus and species                            | Biotyper® sirius |            |                        |                 |                       |                   | VITEK® MS PRIME         |                            |                    |                   |
|----------------------------------------------|------------------|------------|------------------------|-----------------|-----------------------|-------------------|-------------------------|----------------------------|--------------------|-------------------|
|                                              | No. of isolates  | % isolates | log(score) >= 2        | low consistency | log(score) 1.7 - 1.99 | No identification | Confidence score 99.9 % | Confidence score 60-99.8 % | low discrimination | No identification |
| <b>Anaerobes (13 species)</b>                |                  |            |                        |                 |                       |                   |                         |                            |                    |                   |
| <i>Bacteroides fragilis</i>                  | 4                | 0.65%      | 4                      | 0               | 0                     | 0                 | 4                       | 0                          | 0                  | 0                 |
| <i>Bacteroides faecis / thetaiotaomicron</i> | 2                | 0.32%      | 2                      | 0               | 0                     | 0                 | 2                       | 0                          | 0                  | 0                 |
| <i>Clostridium perfringens</i>               | 1                | 0.16%      | 1                      | 0               | 0                     | 0                 | 1                       | 0                          | 0                  | 0                 |
| <i>Clostridium ramosum</i>                   | 1                | 0.16%      | 1                      | 0               | 0                     | 0                 | 1                       | 0                          | 0                  | 0                 |
| <i>Fingoldia magna</i>                       | 1                | 0.16%      | 0                      | 0               | 1                     | 0                 | 1                       | 0                          | 0                  | 0                 |
| <i>Lactobacillus crispatus</i>               | 1                | 0.16%      | 1                      | 0               | 0                     | 0                 | 1                       | 0                          | 0                  | 0                 |
| <i>Lactobacillus jensenii</i>                | 1                | 0.16%      | 1                      | 0               | 0                     | 0                 | 1                       | 0                          | 0                  | 0                 |
| <i>Parvimonas micra</i>                      | 1                | 0.16%      | 1                      | 0               | 0                     | 0                 | 1                       | 0                          | 0                  | 0                 |
| <i>Phocaeicola vulgatus</i>                  | 1                | 0.16%      | 1                      | 0               | 0                     | 0                 | 1                       | 0                          | 0                  | 0                 |
| <i>Prevotella buccae</i>                     | 1                | 0.16%      | 1                      | 0               | 0                     | 0                 | 1                       | 0                          | 0                  | 0                 |
| <i>Prevotella veroralis</i>                  | 1                | 0.16%      | 1                      | 0               | 0                     | 0                 | 1                       | 0                          | 0                  | 0                 |
| <i>Schaalia turicensis</i>                   | 1                | 0.16%      | 1                      | 0               | 0                     | 0                 | 0                       | 0                          | 0                  | 1                 |
| <i>Schaalia odontolytica</i>                 | 2                | 0.32%      | 2                      | 0               | 0                     | 0                 | 1                       | 0                          | 0                  | 1                 |
| <b>Total</b>                                 | <b>618</b>       |            | <b>587<br/>(95.0%)</b> | <b>7 (1.1%)</b> | <b>17 (2.7%)</b>      | <b>7 (1.1%)</b>   | <b>568 (91.9%)</b>      | <b>11 (1.8 %)</b>          | <b>26 (4.2) %</b>  | <b>13 (2.1%)</b>  |

**Table 2** Identifications with disagreement on species level on both systems. Species with a slash indicate that the software was not able to reliably distinguish between both species

|                        | Biotyper <sup>®</sup> sirius             | VITEK <sup>®</sup> MS PRIME          | N (%)     |
|------------------------|------------------------------------------|--------------------------------------|-----------|
| Species identification | <i>Enterobacter hormaechei</i>           | <i>Enterobacter asburiae/cloacae</i> | 12 (52.2) |
|                        | <i>Enterobacter bugandensis</i>          | <i>Enterobacter asburiae/cloacae</i> | 3 (13.0)  |
|                        | <i>Enterobacter kobei</i>                | <i>Enterobacter asburiae/cloacae</i> | 2 (8.7)   |
|                        | <i>Enterobacter ludwigii</i>             | <i>Enterobacter asburiae/cloacae</i> | 2 (8.7)   |
|                        | <i>Bacteroides faecis</i>                | <i>Bacteroides thetaiotaomicron</i>  | 1 (4.3)   |
|                        | <i>Gardnerella leopoldii/swidsinskii</i> | <i>Gardnerella vaginalis</i>         | 1 (4.3)   |
|                        | <i>Proteus hauseri/vulgaris</i>          | <i>Proteus penneri</i>               | 1 (4.3)   |
|                        | <i>Proteus hauseri</i>                   | <i>Proteus vulgaris</i>              | 1 (4.3)   |
